# Supplementary material for: Exercise and the Prevention of Depression: Results of the HUNT Cohort Study
Source: Atypon-hosted journal article supplement (doi:10.1176/appi.ajp.2017.16111223), 2017-10-03
Supplement: appi.ajp.2017.16111223.ds001.pdf [file appi.ajp.2017.16111223.ds001.pdf]

## SA1: Additional File: STROBE checklist

|                           | Item No | Recommendation                                                                                                                                                                                                                                                                                                                                                                                                                                                                                                                                                              |
|---------------------------|---------|-----------------------------------------------------------------------------------------------------------------------------------------------------------------------------------------------------------------------------------------------------------------------------------------------------------------------------------------------------------------------------------------------------------------------------------------------------------------------------------------------------------------------------------------------------------------------------|
| <b>Title and abstract</b> | 1       | (a) Indicate the study's design with a commonly used term in the title or the abstract<br><b>Provided on page 1</b><br>(b) Provide in the abstract an informative and balanced summary of what was done and what was found<br><b>Provided on page 2</b>                                                                                                                                                                                                                                                                                                                     |
| <b>Introduction</b>       |         |                                                                                                                                                                                                                                                                                                                                                                                                                                                                                                                                                                             |
| Background/rationale      | 2       | Explain the scientific background and rationale for the investigation being reported<br><b>Provided in detail on pages 4 to 5</b>                                                                                                                                                                                                                                                                                                                                                                                                                                           |
| Objectives                | 3       | State specific objectives, including any prespecified hypotheses<br><b>Objectives stated clearly in abstract and again on page 6</b>                                                                                                                                                                                                                                                                                                                                                                                                                                        |
| <b>Methods</b>            |         |                                                                                                                                                                                                                                                                                                                                                                                                                                                                                                                                                                             |
| Study design              | 4       | Present key elements of study design early in the paper<br><b>Provided on page 7</b>                                                                                                                                                                                                                                                                                                                                                                                                                                                                                        |
| Setting                   | 5       | Describe the setting, locations, and relevant dates, including periods of recruitment, exposure, follow-up, and data collection<br><b>Provided on page 7</b>                                                                                                                                                                                                                                                                                                                                                                                                                |
| Participants              | 6       | (a) Give the eligibility criteria, and the sources and methods of selection of participants. Describe methods of follow-up<br><b>Provided on pages 7 and 8, with flow diagram in Figure 1</b><br>(b) For matched studies, give matching criteria and number of exposed and unexposed<br><b>Not applicable</b>                                                                                                                                                                                                                                                               |
| Variables                 | 7       | Clearly define all outcomes, exposures, predictors, potential confounders, and effect modifiers. Give diagnostic criteria, if applicable<br><b>Provided on pages 8 to 11. Theoretical hierarchical model demonstrating how potential confounding and mediating factors may interact with both levels of physical activity and common mental disorders provided in Figure 2.</b>                                                                                                                                                                                             |
| Data sources/measurement  | 8*      | For each variable of interest, give sources of data and details of methods of assessment (measurement). Describe comparability of assessment methods if there is more than one group<br><b>Provided on pages 8 to 11</b>                                                                                                                                                                                                                                                                                                                                                    |
| Bias                      | 9       | Describe any efforts to address potential sources of bias<br><b>Tests for possible sample and attrition bias described on pages 8 and 14</b>                                                                                                                                                                                                                                                                                                                                                                                                                                |
| Study size                | 10      | Explain how the study size was arrived at<br><b>Provided on page 8 and in Figure 1</b>                                                                                                                                                                                                                                                                                                                                                                                                                                                                                      |
| Quantitative variables    | 11      | Explain how quantitative variables were handled in the analyses. If applicable, describe which groupings were chosen and why<br><b>Provided on pages 8 to 12</b>                                                                                                                                                                                                                                                                                                                                                                                                            |
| Statistical methods       | 12      | (a) Describe all statistical methods, including those used to control for confounding<br><b>Description of multivariate logistic regression techniques used provided on pages 11 to 13</b><br>(b) Describe any methods used to examine subgroups and interactions<br><b>Description of methods used for <i>a priori</i> planned tests for interaction by age and gender on page 12</b><br>(c) Explain how missing data were addressed<br><b>Description of multiple imputation model using the imputations by chained approach (ICE) method provided on pages 11 and 12</b> |

(d) If applicable, explain how loss to follow-up was addressed

**As above**

(e) Describe any sensitivity analyses

**All analyses repeated without any imputed data**

| <b>Results</b>           |     |                                                                                                                                                                                                                                                                                                                                                                                                                                                                |
|--------------------------|-----|----------------------------------------------------------------------------------------------------------------------------------------------------------------------------------------------------------------------------------------------------------------------------------------------------------------------------------------------------------------------------------------------------------------------------------------------------------------|
| Participants             | 13* | (a) Report numbers of individuals at each stage of study—eg numbers potentially eligible, examined for eligibility, confirmed eligible, included in the study, completing follow-up, and analysed<br><b>Provided on pages 8 and 14</b><br>(b) Give reasons for non-participation at each stage<br><b>Provided on pages 8 and 14</b><br>(c) Consider use of a flow diagram<br><b>Figure 1</b>                                                                   |
| Descriptive data         | 14* | (a) Give characteristics of study participants (eg demographic, clinical, social) and information on exposures and potential confounders<br><b>Table 1</b><br>(b) Indicate number of participants with missing data for each variable of interest<br><b>Table 1</b><br>(c) Summarise follow-up time (eg, average and total amount)<br><b>As described on page 7, an average follow up time of 11 years with a range of 9 to 13 years</b>                       |
| Outcome data             | 15* | Report numbers of outcome events or summary measures over time<br><b>Reported on page 14</b>                                                                                                                                                                                                                                                                                                                                                                   |
| Main results             | 16  | (a) Give unadjusted estimates and, if applicable, confounder-adjusted estimates and their precision (eg, 95% confidence interval). Make clear which confounders were adjusted for and why they were included<br><b>Table 2</b><br>(b) Report category boundaries when continuous variables were categorized<br><b>Described on page 12</b><br>(c) If relevant, consider translating estimates of relative risk into absolute risk for a meaningful time period |
| Other analyses           | 17  | Report other analyses done—eg analyses of subgroups and interactions, and sensitivity analyses<br><b>Reported on page 15 and in Figure 3</b>                                                                                                                                                                                                                                                                                                                   |
| <b>Discussion</b>        |     |                                                                                                                                                                                                                                                                                                                                                                                                                                                                |
| Key results              | 18  | Summarise key results with reference to study objectives<br><b>Page 16</b>                                                                                                                                                                                                                                                                                                                                                                                     |
| Limitations              | 19  | Discuss limitations of the study, taking into account sources of potential bias or imprecision. Discuss both direction and magnitude of any potential bias<br><b>Limitations discussed on pages 17 and 18</b>                                                                                                                                                                                                                                                  |
| Interpretation           | 20  | Give a cautious overall interpretation of results considering objectives, limitations, multiplicity of analyses, results from similar studies, and other relevant evidence<br><b>Presented on pages 19 to 21</b>                                                                                                                                                                                                                                               |
| Generalisability         | 21  | Discuss the generalisability (external validity) of the study results<br><b>Discussed on page 18</b>                                                                                                                                                                                                                                                                                                                                                           |
| <b>Other information</b> |     |                                                                                                                                                                                                                                                                                                                                                                                                                                                                |
| Funding                  | 22  | Give the source of funding and the role of the funders for the present study and, if applicable, for the original study on which the present article is based<br><b>Pages 21 and 22.</b>                                                                                                                                                                                                                                                                       |
