# Supplementary material for: Exercise and the Prevention of Depression: Results of the HUNT Cohort Study
Source: Atypon-hosted journal article supplement (doi:10.1176/appi.ajp.2017.16111223), 2017-10-03
Supplement: appi.ajp.2017.16111223.ds001.pdf [file appi.ajp.2017.16111223.ds001.pdf]

 


Psychiatry Online
